# Supplementary material for: Salt-bridge mediated conformational dynamics in the figure-of-eight knotted ketol acid reductoisomerase (KARI)
Source: Royal Society of Chemistry journal article supplement (doi:10.1039/d4cp02677b), 2024-01-01
Supplement: d4cp02677b1.pdf [file d4cp02677b1.pdf]

## Supporting Information

### Salt-Bridged Mediated Conformational Dynamics in the Figure-of-Eight Knotted Ketol Acid Reductoisomerase (KARI)

Sanjib Thakuria<sup>a</sup> and Sandip Paul<sup>a,\*</sup>

<sup>a</sup>*Department of Chemistry, Indian Institute of Chemistry, Guwahati, Assam, India-781039*

E-mail: sandipp@iitg.ac.in

# 1 Equations

The initial step in Principal Component Analysis (PCA) is the generation of the covariance matrix,  $C$ , from the trajectories of our Cartesian coordinate space using the  $C_\alpha$  atoms of the protein. Subsequently, a least square fit superimposition (rms fit) onto the reference structure is executed to remove the rotational and vibrational modes. Finally, we attain our PCs by diagonalizing this covariance matrix.<sup>1,2</sup>

$$C = R\lambda R^T \tag{S1}$$

where  $\lambda$  and  $R$  contain the eigenvalues and the corresponding eigenvectors of matrix  $C$  respectively.

The following equation is used for the calculation of Dynamic Cross-Correlation Map (DCCM):<sup>3,4</sup>

$$C_{ij} = \frac{\langle \Delta r_i \cdot \Delta r_j \rangle}{\sqrt{\langle \Delta r_i \cdot \Delta r_i \rangle \langle \Delta r_j \cdot \Delta r_j \rangle}} (i, j = 1, 2, 3, \dots, 3N) \tag{S2}$$

where  $\Delta r_i$  and  $\Delta r_j$  is the mean displacement of the  $i^{\text{th}}$  and  $j^{\text{th}}$  residue respectively, while  $N$  denotes the total number of  $C_\alpha$  atoms.  $C_{ij}$  ranges from -1 to +1.

The harmonic potential  $V_i$  at window  $i$  is expressed as

$$V_i = 1/2k(x - r_i)^2 \tag{S3}$$

where  $k$  is the force constant with  $r_i$  being the reference position. Weighted Histogram Analysis Method (WHAM)<sup>5,6</sup> was utilised for the calculation of the unbaised probability distribution in  $x$  referred as  $P(x)$ . The final PMF was obtained as

$$PMF = -K_B T \ln P(x) \tag{S4}$$

## 2 Denaturation of the protein

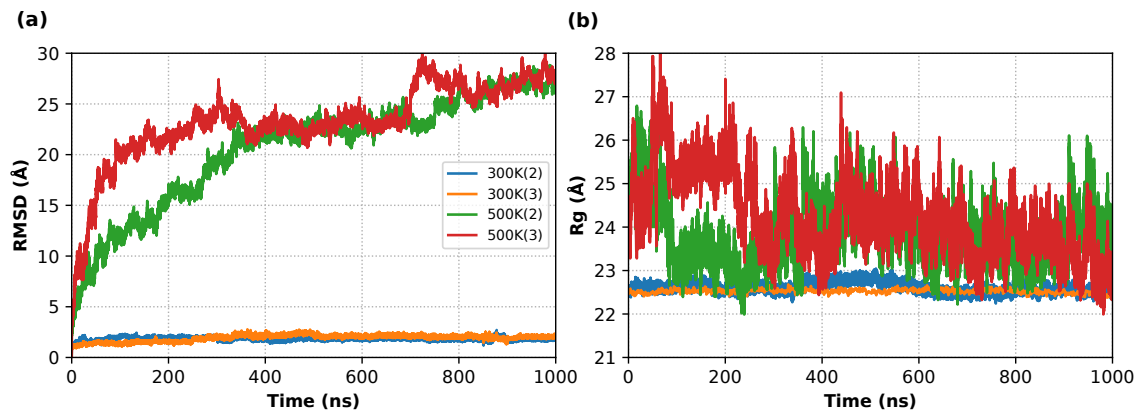

Figure S1: Time evolution of (a) Root Mean Square Deviation (RMSD) and (b) Radius of Gyration ( $R_g$ ) of the backbone atoms of 3fr8 at temperatures of 300K and 500K for trajectories 2 and 3 respectively.

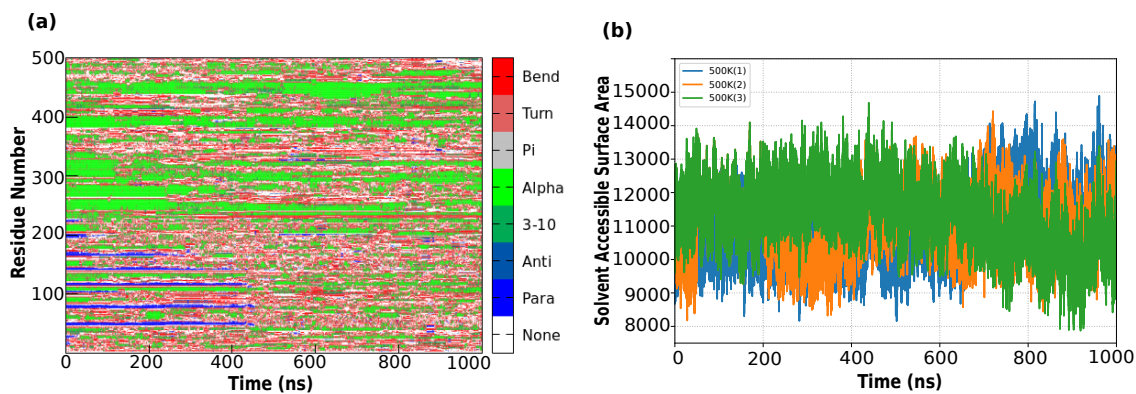

Figure S2: Time evolution of (a) secondary structure of 3fr8 using DSSP algorithm at 500K (b) Solvent Accessible Surface Area (SASA) of the knotted domain.

### 3 DCCM and Correlation Cutoffs

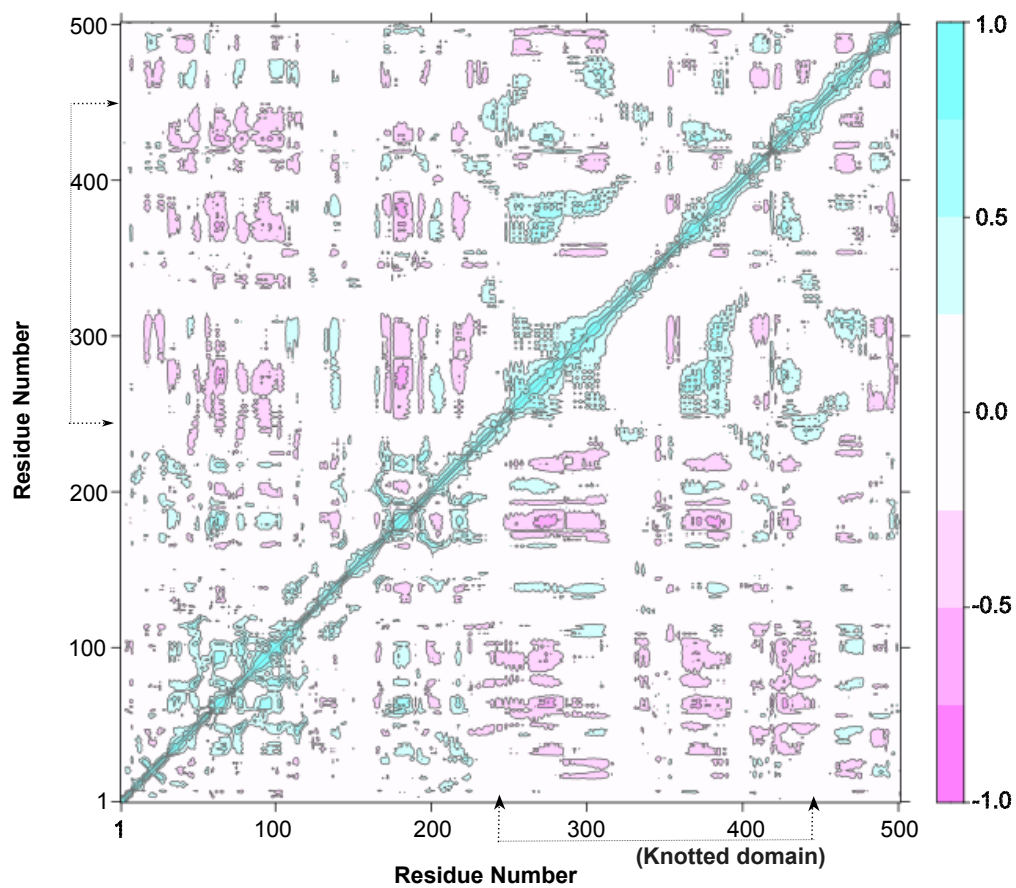

Figure S3: The DCCM map of 3fr8 indicating the knotted regions (residues 239 to 442).



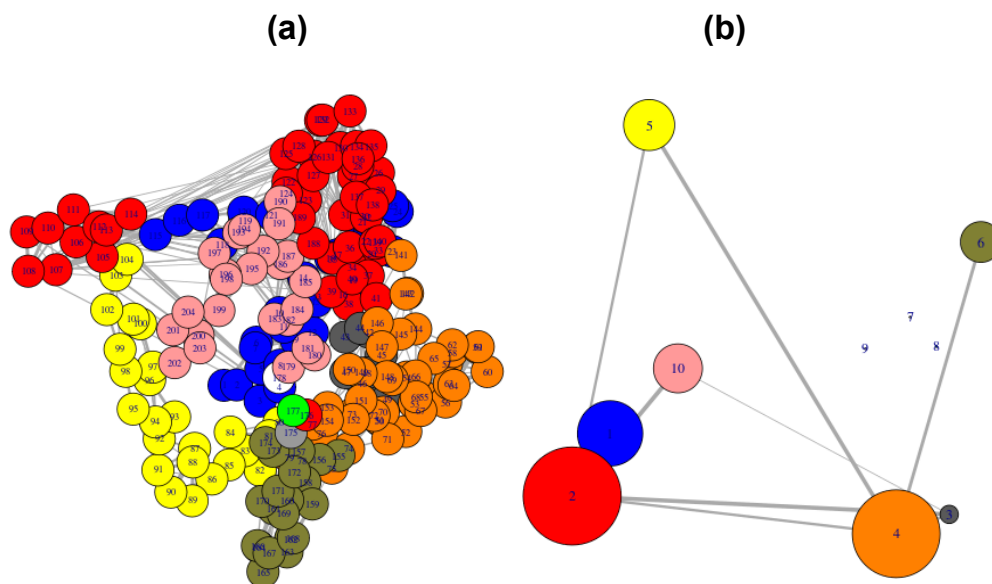

Figure S4: Full Residue Community Network (a) and the corresponding Minimalized Network of  $3fr8_{knot}$ .

Table S1: Modularity scores and community nodes for the correlation cutoff for  $3fr8_{knot}$

| cf  | Community Nodes | Modularity |
|-----|-----------------|------------|
| 0.3 | 9               | 0.26       |
| 0.4 | 9               | 0.39       |
| 0.5 | 12              | 0.47       |
| 0.6 | 10              | 0.70       |
| 0.7 | 18              | 0.65       |

## 4 Clusters

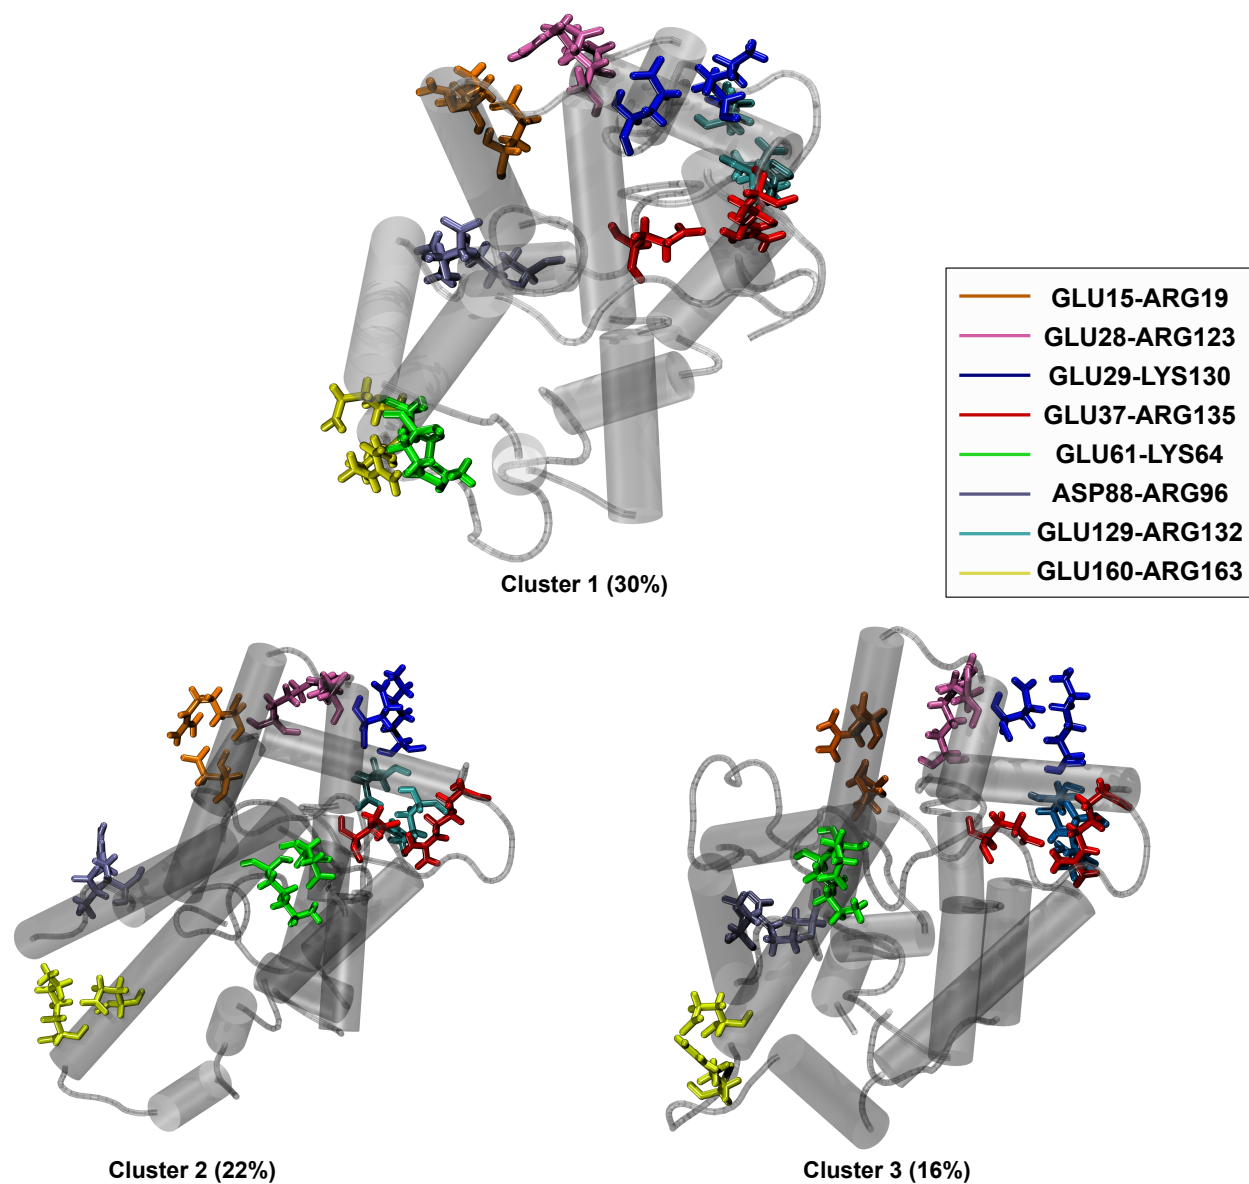

Figure S5: Snapshots of the three most populated clusters highlighting the major salt bridges.

Table S2: Occupancy of the salt bridges with increasing temperatures

| Salt Bridges  | Occupancy |      |      |
|---------------|-----------|------|------|
|               | 300K      | 400K | 500K |
| GLU15:ARG19   | 0.75      | 0.56 | 0.17 |
| GLU28:ARG123  | 0.70      | 0.31 |      |
| GLU29:LYS130  | 0.55      | 0.21 | 0.05 |
| GLU37:ARG135  | 0.91      | 0.61 |      |
| GLU61:LYS64   | 0.37      | 0.39 | 0.29 |
| ASP88:ARG96   | 0.25      | 0.06 |      |
| GLU129:ARG132 | 0.69      | 0.52 | 0.49 |
| GLU160:ARG163 | 0.59      | 0.45 | 0.42 |

## 5 Mutated Systems

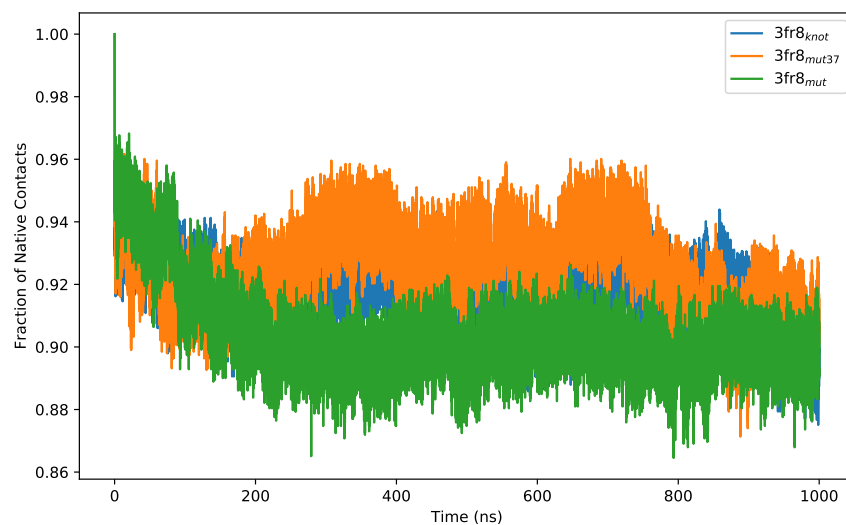

Figure S6: Native Contact Ratio of the three protein at 300K.

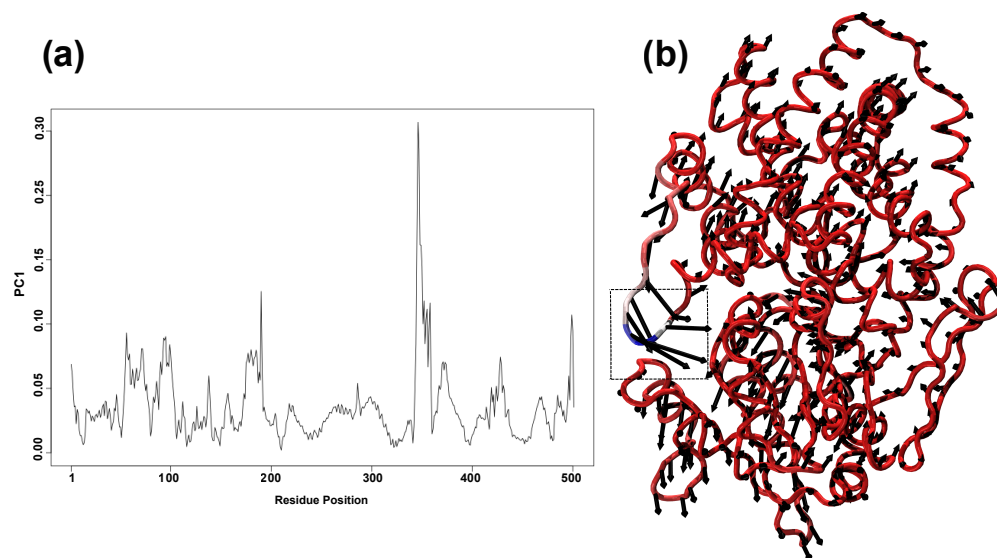

Figure S7: Contribution of residues to the first Principal Component (PC1) (a) and Porcupine plots of PC1(b) for 3fr8 respectively. The rectangular box in (b) denotes the regions (residue 340 to 357) of high mobility.

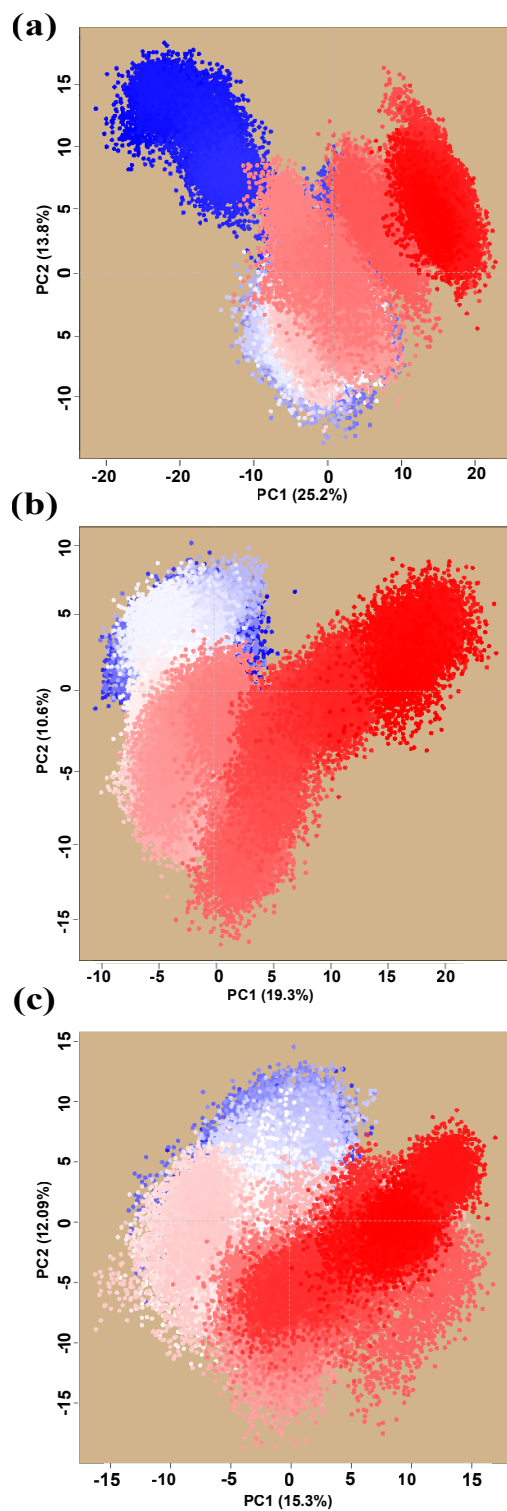

Figure S8: Principal Component Analysis (PCA) using first Principal Component (PC1) and second Principal Component (PC2) after removal of the  $\beta$ -turn residues 100-117 for (a)  $3\text{fr}8_{\text{knot}}$ , (b)  $3\text{fr}8_{\text{mut}37}$ , and (c)  $3\text{fr}8_{\text{mut}}$  at 300K respectively.

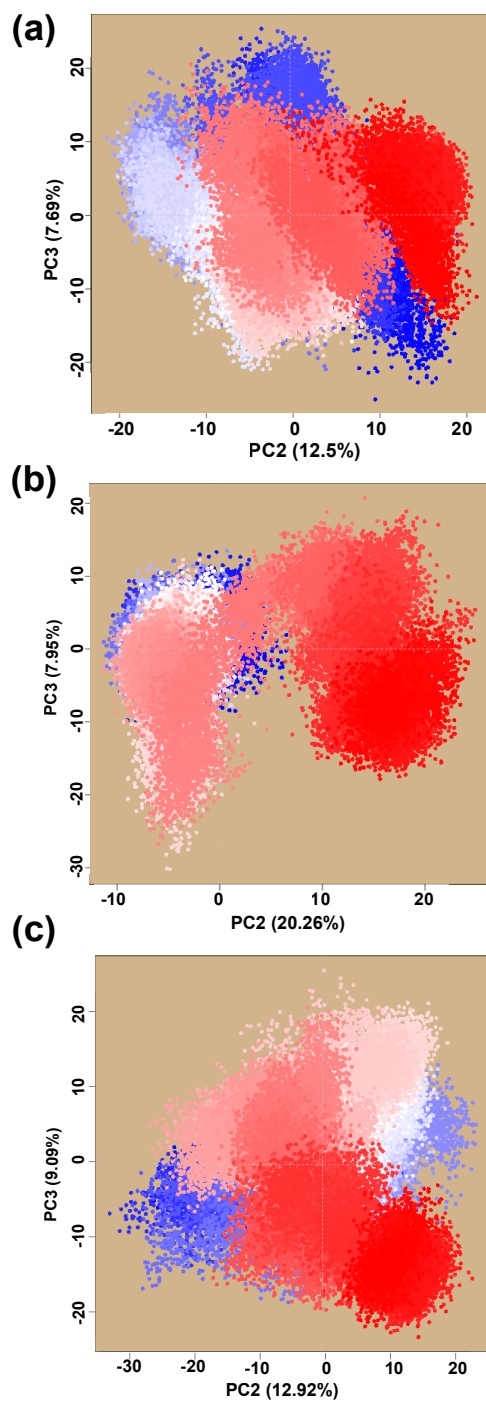

Figure S9: Principal Component Analysis (PCA) using second Principal Component (PC2) and third Principal Component (PC3) for (a) 3fr8<sub>knot</sub>, (b) 3fr8<sub>mut37</sub>, and (c) 3fr8<sub>mut</sub> at 300K respectively.

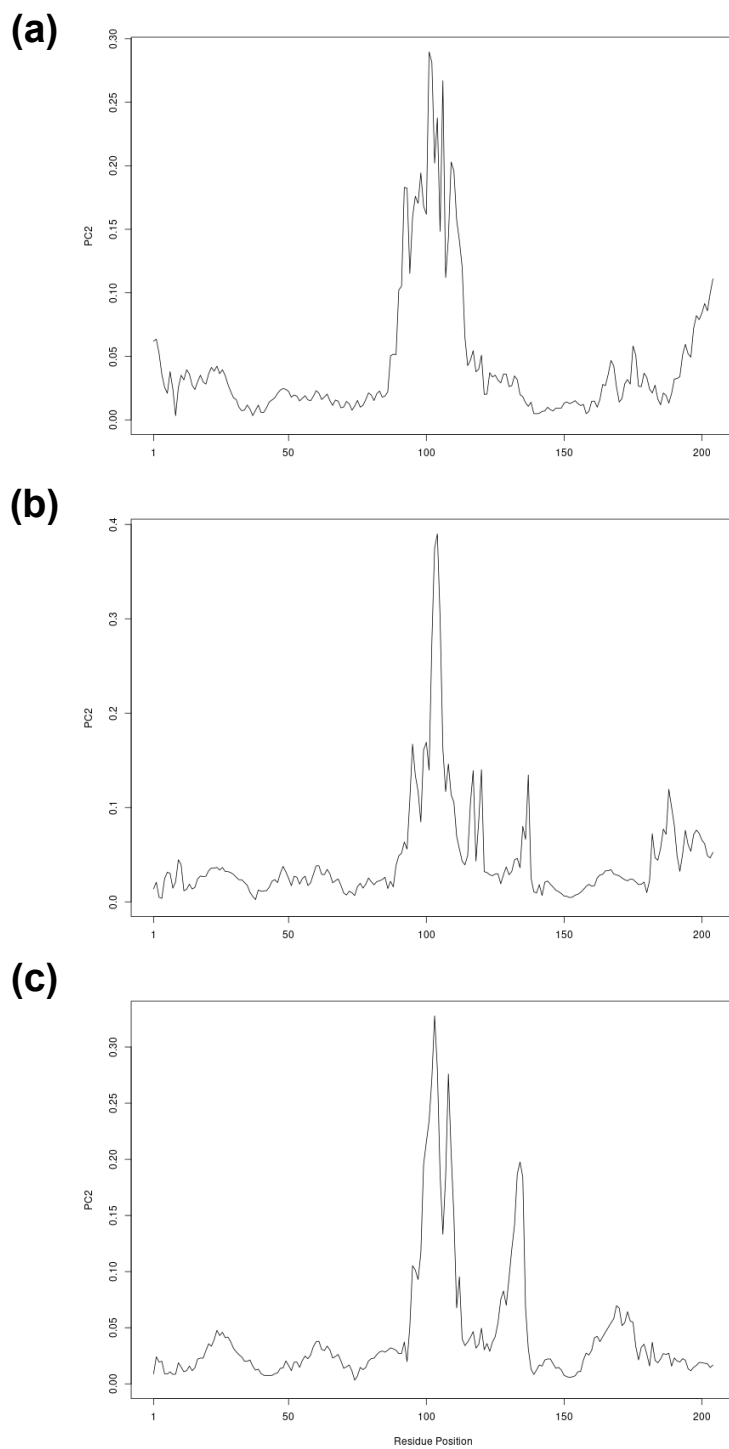

Figure S10: Contribution of residues to the second Principal Component (PC2) for (a)  $3fr8_{knot}$ , (b)  $3fr8_{mut37}$ , and (c)  $3fr8_{mut}$  at 300K respectively.

Table S3: Knotted regions of monomeric 3fr8 and the mutants at 500K for trajectory 2

| Time (ns) | Core Length |            |          | Core Range |            |          |
|-----------|-------------|------------|----------|------------|------------|----------|
|           | 3fr8        | 3fr8-mut37 | 3fr8-mut | 3fr8       | 3fr8-mut37 | 3fr8-mut |
| 0         | 203         | 203        | 203      | 239-442    | 239-442    | 239-442  |
| 100       | 222         | 221        | 208      | 226-448    | 223-444    | 237-445  |
| 200       | 329         | 335        | 335      | 112-441    | 101-436    | 105-440  |
| 300       | 356         | 348        | 360      | 87-443     | 89-437     | 72-432   |
| 400       | 406         | -          | -        | 33-439     | -          | -        |
| 500       | 410         | 384        | 386      | 48-448     | 59-443     | 55-441   |
| 600       | 408         | 424        | -        | 47-455     | 45-469     | -        |
| 700       | 418         | -          | 411      | 37-455     | -          | 47-458   |
| 800       | 476         | -          | -        | 17-493     | -          | -        |
| 900       | 484         | 476        | 478      | 7-491      | 10-486     | 7-485    |
| 1000      | 469         | -          | 484      | 23-492     | -          | 8-492    |

Table S4: Knotted regions of monomeric 3fr8 and the mutants at 500K for trajectory 3

| Time (ns) | Core Length |            |          | Core Range |            |          |
|-----------|-------------|------------|----------|------------|------------|----------|
|           | 3fr8        | 3fr8-mut37 | 3fr8-mut | 3fr8       | 3fr8-mut37 | 3fr8-mut |
| 0         | 203         | 203        | 203      | 239-442    | 239-442    | 239-442  |
| 100       | 232         | 228        | 226      | 213-445    | 232-460    | 234-460  |
| 200       | 348         | 327        | 329      | 89-437     | 232-459    | 128-457  |
| 300       | 384         | 360        | 354      | 59-443     | 73-433     | 87-441   |
| 400       | 402         | 402        | 393      | 48-450     | 52-454     | 56-449   |
| 500       | 418         | 411        | 415      | 37-455     | 48-459     | 35-450   |
| 600       | 408         | 415        | -        | 47-455     | 37-452     | -        |
| 700       | 389         | -          | 402      | 50-439     | -          | 50-452   |
| 800       | -           | 418        | 420      | -          | 38-456     | 41-461   |
| 900       | 409         | 470        | 478      | 36-445     | 15-485     | 15-493   |
| 1000      | 484         | 469        | 476      | 10-494     | 22-491     | 11-487   |



## References

- (1) Mesentean, S.; Fischer, S.; Smith, J. C. Analyzing large-scale structural change in proteins: Comparison of principal component projection and sammon mapping. *Proteins: Struct., Funct., Bioinf.* **2006**, *64*, 210–218.
- (2) Skjaerven, L.; Martinez, A.; Reuter, N. Principal component and normal mode analysis of proteins; a quantitative comparison using the GroEL subunit. *Proteins: Struct., Funct., Bioinf.* **2011**, *79*, 232–243.
- (3) Arnold, G. E.; Ornstein, R. L. Molecular dynamics study of time-correlated protein domain motions and molecular flexibility: cytochrome P450BM-3. *Biophys. J.* **1997**, *73*, 1147–1159.
- (4) Junaid, M.; Shah, M.; Khan, A.; Li, C.-D.; Khan, M. T.; Kaushik, A. C.; Ali, A.; Mehmood, A.; Nangraj, A. S.; Choi, S., et al. Structural-dynamic insights into the H. pylori cytotoxin-associated gene A (CagA) and its abrogation to interact with the tumor suppressor protein ASPP2 using decoy peptides. *J. Biomol. Struct. Dyn.* **2018**,
- (5) Kumar, S.; Rosenberg, J. M.; Bouzida, D.; Swendsen, R. H.; Kollman, P. A. The weighted histogram analysis method for free-energy calculations on biomolecules. I. The method. *J. Comput. Chem.* **1992**, *13*, 1011–1021.
- (6) Kumar, S.; Rosenberg, J. M.; Bouzida, D.; Swendsen, R. H.; Kollman, P. A. Multi-dimensional free-energy calculations using the weighted histogram analysis method. *J. Comput. Chem.* **1995**, *16*, 1339–1350.
